# Supplementary material for: Formation mechanism of magnetic–plasmonic Ag@FeCo@Ag core–shell–shell nanoparticles: fact is more interesting than fiction
Source: Royal Society of Chemistry journal article supplement (doi:10.1039/c5ce00394f), 2015-01-01
Supplement: c5ce00394f1.pdf [file c5ce00394f1.pdf]

## Electronic Supplementary Information

### Formation mechanism of magnetic-plasmonic Ag@FeCo@Ag core-shell-shell nanoparticles: Fact is more interesting than fiction

*Mari Takahashi, Koichi Higashimine, Priyank Mohan, Derrick Mott, and Shinya Maenosono*

School of Materials Science, Japan Advanced Institute of Science and Technology, 1-1 Asahidai,  
Nomi, Ishikawa 923-1292, Japan

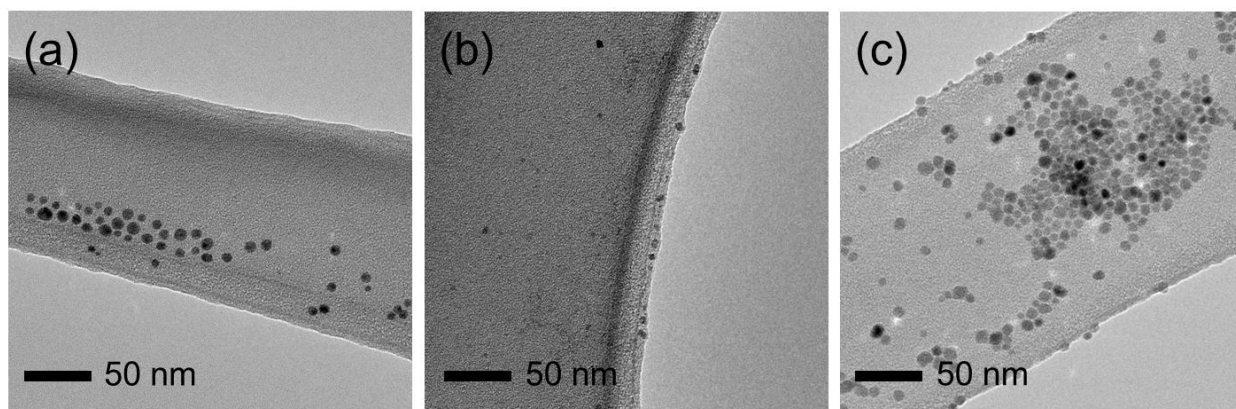

**Fig. S1** TEM images of (a) Ag@FeCo NPs which were sampled at 250 °C, (b)  $\text{Co}_x\text{Fe}_{1-x}\text{O}$  NPs which were sampled at 290 °C and (c) resulting  $\text{Co}_x\text{Fe}_{1-x}\text{O}$  NPs after the reaction.

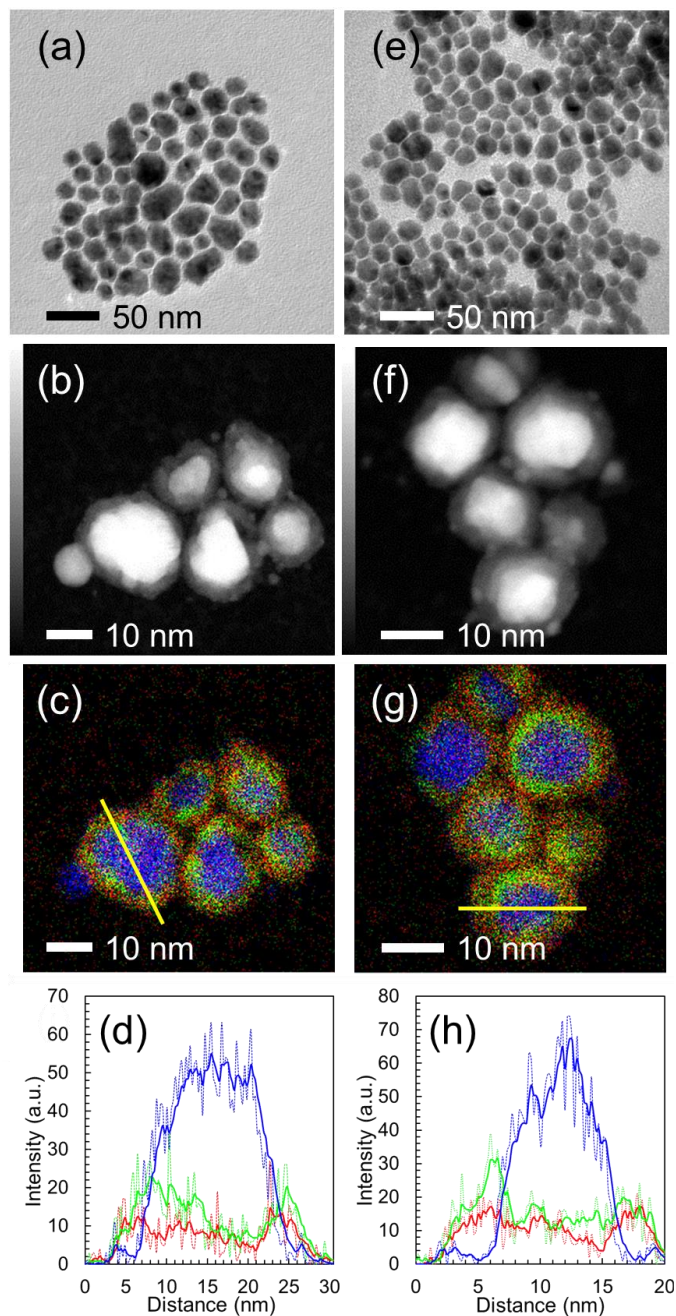

**Fig. S2** Ag@FeCo@Ag NPs synthesized by changing order of the precursors. (a)-(c) Ag@FeCo@Ag NPs synthesized by injecting all precursors at 170 °C. (a) TEM image, (b) STEM-HAADF image, (c) EDS elemental mapping image, (d) line profile of yellow line indicated in (c). The blue color shows Ag L edge, the green color shows Co K edge, the red color shows Fe K edge. (e)-(g) Ag@FeCo@Ag NPs synthesized by putting all precursors into a flask from the very beginning. (e) TEM image, (f) STEM-HAADF image, (g) EDS elemental mapping image, (h) line profile of yellow line indicated in (g). In both cases Ag@FeCo@Ag core-shell-shell structure was confirmed.
